# Supplementary material for: Genomic analysis of DNA repair genes and androgen signaling in prostate cancer
Source: Springer Nature journal article supplement (doi:10.1186/s12885-018-4848-x), 2018-10-10

### LNCaP

### VCaP

#### HALLMARK\_ANDROGEN\_RESPONSE

#### HALLMARK\_ANDROGEN\_RESPONSE

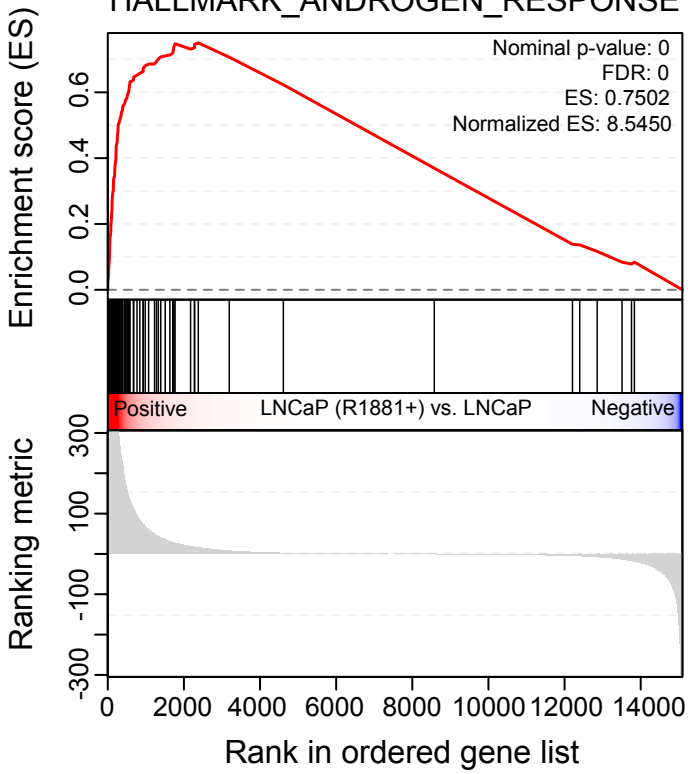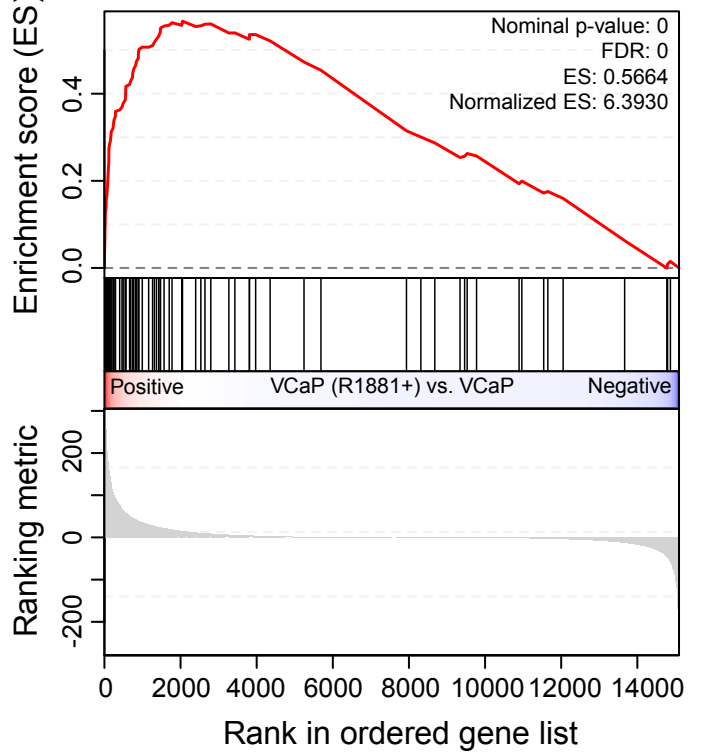

### PC3-AR

#### HALLMARK\_ANDROGEN\_RESPONSE

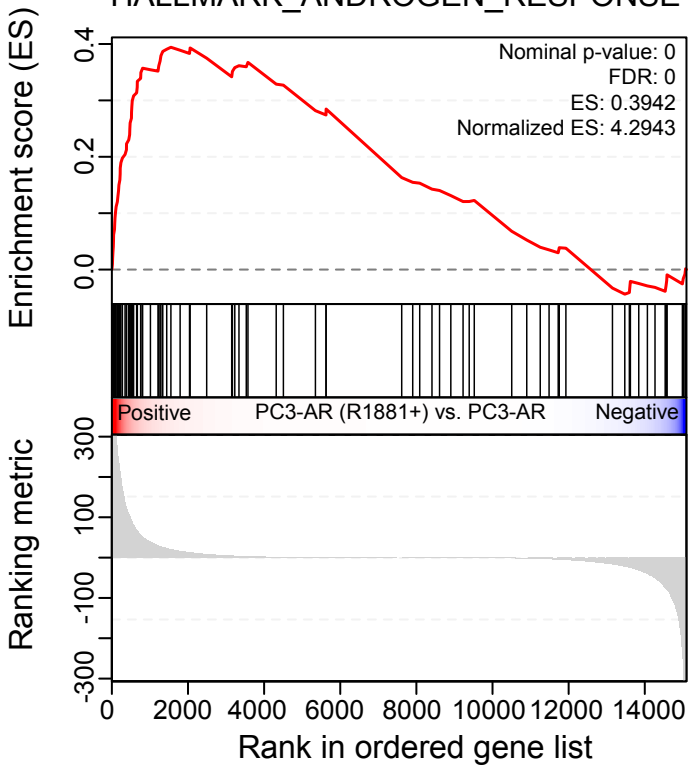

Supplement: MOESM4 [file 16189152]
